# Supplementary material for: The origin of exotic pet sugar gliders (Petaurus breviceps) kept in the United States of America
Source: PeerJ. 2019 Jan 8;7:e6180. doi: 10.7717/peerj.6180 (PMC6329365; doi:10.7717/peerj.6180)
Supplement: Table S1 — Sugar glider websites containing anecdotal and sometimes conflicting information on the origin of the introduction, time of introduction and regularity of the introduction of sugar gliders into the USA. [file peerj-07-6180-s002.xlsx]

## Sheet: Sheet1
Table S1: Sugar glider websites in the United States of America purporting varying information on the origin of the introduction, time of introduction and regularity of the introduction of sugar gliders into the USA.
http://www.sugarglider.com/archives/ruth/
https://www.msdvetmanual.com/all-other-pets/sugar-gliders/introduction-to-sugar-gliders#v3231091
http://www.glidercentral.net/ubbthreads/ubbthreads.php/topics/795062/Wild_Sugar_Gliders_into_US
http://www.gliderpets.com/
https://www.sugargliderinfo.org/questions-and-answers
https://en.wikipedia.org/wiki/Sugar_glider
