# Supplementary material for: The origin of exotic pet sugar gliders (Petaurus breviceps) kept in the United States of America
Source: PeerJ. 2019 Jan 8;7:e6180. doi: 10.7717/peerj.6180 (PMC6329365; doi:10.7717/peerj.6180)
Supplement: Table S3 [file peerj-07-6180-s004.xlsx]

## Sheet: Sheet1
Table S3: Summary of nucleotide substitution models selected for data partitioning using the Akaike Information Criterion in MEGA v7.0.
Gene	Model of evolution	Gamma shape	Invariant sites
ND2	HKY+G	0.29	0
ND4	HKY+G	0.44	0
ω-globin	JC	0	0
